# Supplementary material for: Hierarchical structures based on gold nanoparticles embedded into hollow ceria spheres and mesoporous silica layers with high catalytic activity and stability
Source: Royal Society of Chemistry journal article supplement (doi:10.1039/c5nj01990g), 2015-01-01
Supplement: c5nj01990g1.pdf [file c5nj01990g1.pdf]

## Supporting information

### **Hierarchical structure based on gold nanoparticles embedded into hollow ceria sphere and mesoporous silica layer with high catalytic activity and stability**

Yiwei Zhang, Yuanmei Xu, Yuming Zhou\*, Sanming Xiang,

Xiaoli Sheng, Qianli Wang, Chao Zhang

*School of Chemistry and Chemical Engineering, Southeast University, Nanjing, 211189, China.*

*E-mail address: ymzhou@seu.edu.cn.*

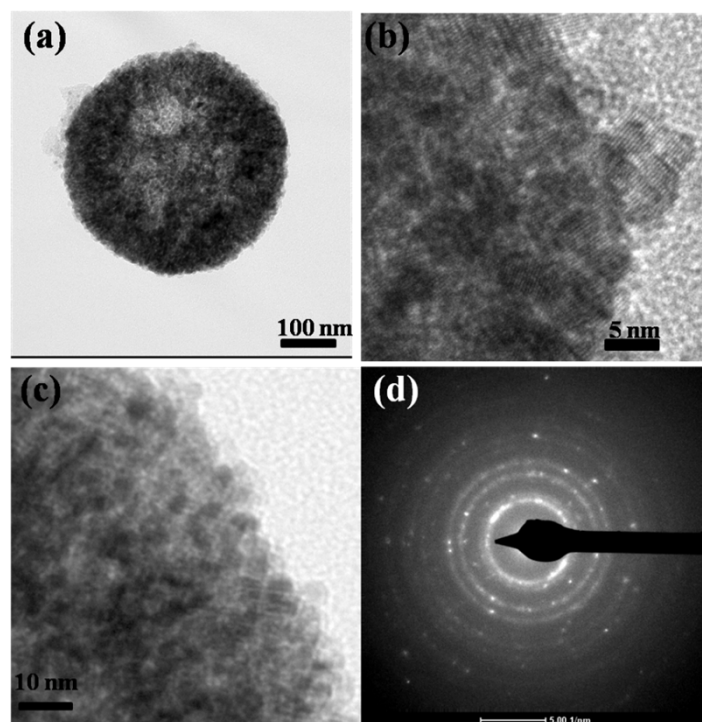

**Fig. S1** (a) and (b) TEM images of porous CeO<sub>2</sub> hollow nanospheres with different magnifications, (c) TEM images of CeO<sub>2</sub>/Au.(d) EDS of CeO<sub>2</sub>/Au.

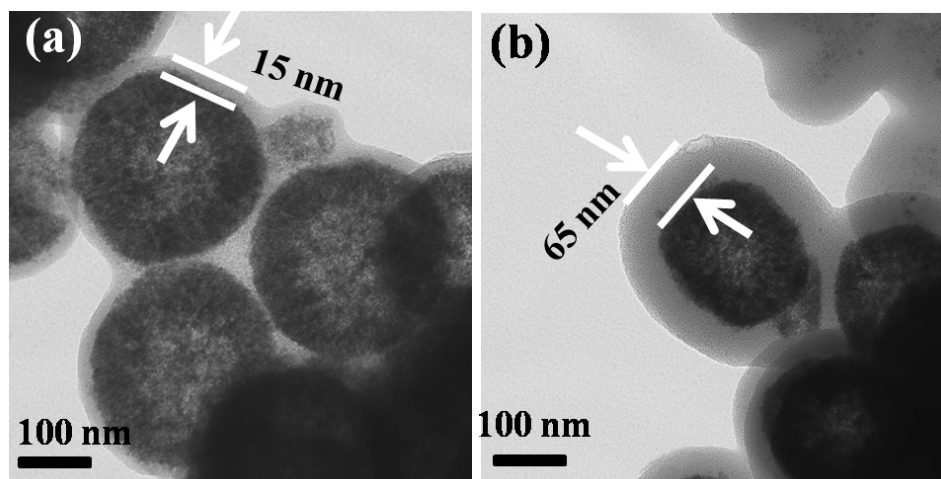

**Fig. S2** The TEM images of  $\text{CeO}_2/\text{Au}@\text{SiO}_2$  with different amount of TEOS:  
 (a)  $\text{CeO}_2/\text{Au}@\text{SiO}_2$ -15, (b)  $\text{CeO}_2/\text{Au}@\text{SiO}_2$ -65

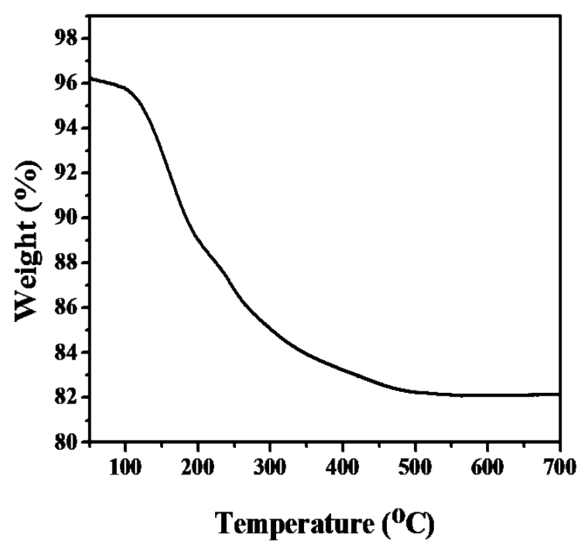

**Fig. S3** TGA curves of hollow  $\text{CeO}_2/\text{Au}@\text{SiO}_2$  nanospheres under air atmosphere.

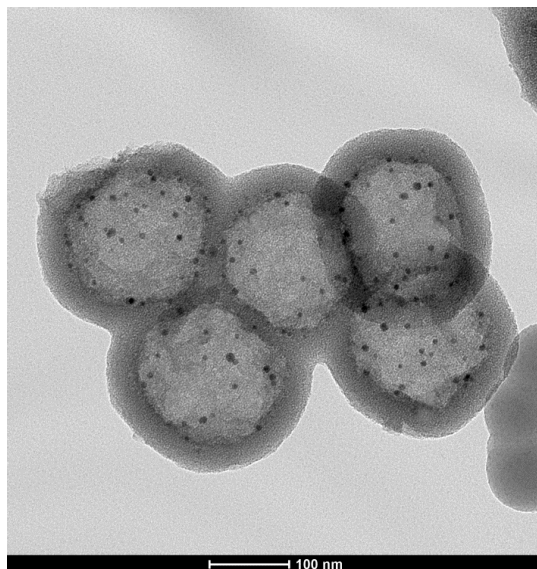

**Fig. S4** The TEM of the sample after removal of the  $\text{CeO}_2$ .

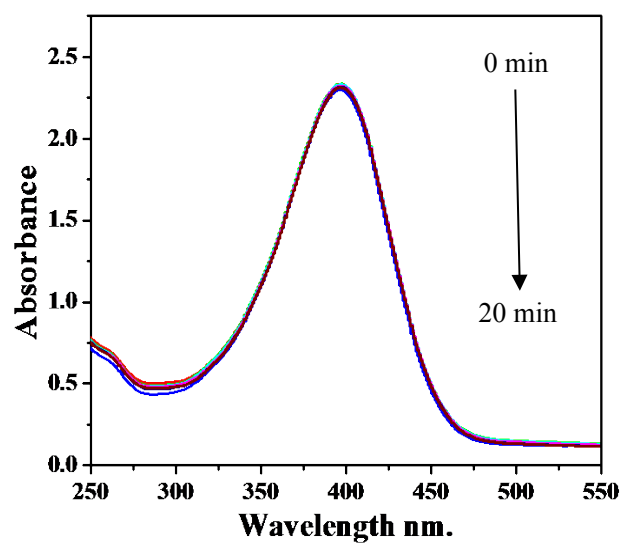

**Fig. S5** The solution without catalyst for two days.

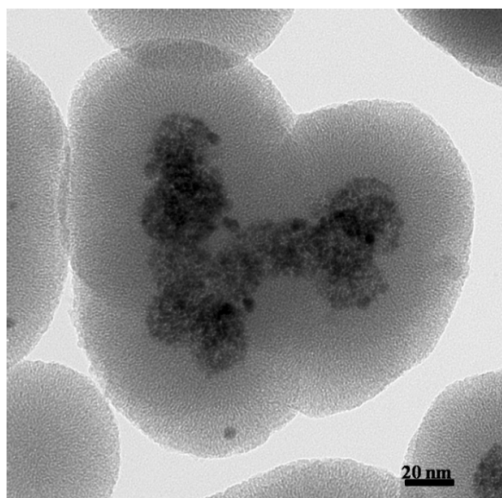

**Fig. S6** The TEM of solid  $\text{CeO}_2/\text{Au}@\text{SiO}_2$ .
